# Supplementary material for: Risk Factors for Incidence of Cardiovascular Diseases and All-Cause Mortality in a Middle Eastern Population over a Decade Follow-up: Tehran Lipid and Glucose Study
Source: PubMed Central journal article supplement (PMC5145170; doi:10.1371/journal.pone.0167623), 2016-12-08
Supplement: pone.0167623.s001.pdf [file pone.0167623.s001.pdf]

**Table A.** Multivariate-adjusted hazard ratios and 95% confidence intervals (CIs) of potential cardiovascular risk factors for incident CVD and all-cause mortality, without obesity mediators controlling for central adiposity status, Tehran lipid and Glucose study (1999-2005)

|                                     | CVD event |                         |         |             |                         |       | All-cause mortality |                         |         |             |                         |       |
|-------------------------------------|-----------|-------------------------|---------|-------------|-------------------------|-------|---------------------|-------------------------|---------|-------------|-------------------------|-------|
|                                     | HR        | 95% confidence interval | p-value | Prevalence* | 95% confidence interval | PAF*  | HR                  | 95% confidence interval | p-value | Prevalence* | 95% confidence interval | PAF*  |
| Central obesity                     | 1.49      | 1.30-1.71               | <0.0001 | 0.52        | 0.48-0.55               | 17.10 | 1.09                | 0.92-1.29               | 0.292   |             |                         |       |
| Current Smoker                      | 1.51      | 1.25-1.81               | <0.0001 | 0.20        | 0.17-0.23               | 6.75  | 1.67                | 1.33-2.11               | <0.0001 | 0.18        | 0.14-0.21               | 7.22  |
| Education                           |           |                         |         |             |                         |       |                     |                         |         |             |                         |       |
| >12 years                           | 1         |                         |         |             |                         |       | 1                   |                         |         | 0.05        | 0.02-0.06               |       |
| 6-12 years                          | 1.22      | 0.92-1.62               | 0.161   |             |                         | -     | 1.50                | 0.94-2.38               | 0.087   | 0.22        | 0.19-0.260              | 7.33  |
| <6 years                            | 1.14      | 0.85-1.51               | 0.366   |             |                         | -     | 1.65                | 1.04-2.60               | 0.030   | 0.73        | 0.69-0.77               | 28.75 |
| Family history of CVD               | 1.58      | 1.34-1.88               | <0.0001 | 0.21        | 0.17-0.23               | 7.70  | 1.32                | 1.05-1.64               | 0.014   | 0.18        | 0.14-0.21               | 4.36  |
| Male gender (female as a reference) | 1.65      | 1.41-1.93               | <0.0001 |             |                         | -     | 1.42                | 1.17-1.71               | <0.0001 |             |                         | -     |
| Prevalent CVD                       |           |                         |         |             |                         | -     | 1.97                | 1.59-2.42               | <0.0001 | 0.21        | 0.17-0.23               | 9.70  |

\*Prevalence represents the prevalence of the exposure among individuals with outcome of interest

\*\*The population attributed fractions were calculated using the following formula:  $Prevalence * ((Hazard\ ratio - 1) / Hazard\ ratio)$

HR, hazard ratio; HDL-C, high density lipoprotein cholesterol; CKD, chronic kidney disease;

The definition for categorical variables is shown in table 1.

**Table B:** Multivariate-adjusted hazard ratios and 95% confidence intervals (CIs) of potential cardiovascular risk factors for incident CVD and all-cause mortality, with obesity mediators ( diabetes, hypertension, lipid profile and CKD), controlling for central adiposity status, Tehran lipid and Glucose study (1999-2005)

|                                    | CVD event |      |                         |         |              |                         |       | All-cause mortality |      |                         |         |              |                         |        |
|------------------------------------|-----------|------|-------------------------|---------|--------------|-------------------------|-------|---------------------|------|-------------------------|---------|--------------|-------------------------|--------|
|                                    | N(event)  | HR   | 95% confidence interval | p-value | Prevalence * | 95% confidence interval | PAF** | N(event)            | HR   | 95% confidence interval | p-value | Prevalence * | 95% confidence interval | PAF**  |
| Central obesity                    | 432       | 1.17 | 1.01-1.35               | 0.032   | 0.52         | 0.48-0.55               | 14.52 |                     | 0.95 | 0.80-1.14               | 0.633   |              |                         | -      |
| High TG                            | 540       | 1.01 | 0.86-1.19               | 0.879   |              |                         |       | 295                 | 0.80 | 0.66-0.97               | 0.027   | 0.53         | 0.49-0.57               | -13.25 |
| High TC                            | 346       | 1.58 | 1.36-1.84               | <0.0001 | 0.45         | 0.51-0.58               | 16.51 | 191                 | 1.03 | 0.85-1.25               | 0.726   |              |                         |        |
| LowHDL-C                           | 584       | 1.20 | 1.02-1.41               | 0.023   | 0.71         | 0.67-0.73               | 11.83 | 336                 | 0.94 | 0.78-1.12               | 0.500   |              |                         |        |
| Blood pressure status              |           |      |                         |         |              |                         |       |                     |      |                         |         |              |                         |        |
| Normal                             | 174       | 1    |                         |         | 0.21         | 0.18-0.23               |       | 105                 | 1    |                         |         | 0.20         | 0.15-0.22               |        |
| prehypertension                    | 241       | 1.12 | 0.98-1.37               | 0.260   | 0.29         | 0.26-0.32               |       | 129                 | 0.86 | 0.66-1.13               | 0.297   | 0.23         | 0.19-0.26               |        |
| Hypertension                       | 412       | 1.75 | 1.43-2.14               | <0.0001 | 0.49         | 0.46-0.53               | 21.00 | 317                 | 1.36 | 1.06-1.74               | 0.014   | 0.57         | 0.53-0.61               | 15.08  |
| Blood sugar status                 |           |      |                         |         |              |                         |       |                     |      |                         |         |              |                         |        |
| Normal                             | 353       | 1    |                         |         | 0.43         | 0.39-0.46               |       | 200                 | 1    |                         |         | 0.36         | 0.32-0.40               |        |
| prediabetes                        | 223       | 1.10 | 0.92-1.31               | 0.264   | 0.27         | 0.23-0.29               |       | 130                 | 1.10 | 0.88-1.39               | 0.368   | 0.23         | 0.20-0.27               |        |
| Diabetes                           | 251       | 1.83 | 1.53-2.18               | <0.0001 | 0.30         | 0.27-0.33               | 13.60 | 221                 | 2.48 | 2.02-3.05               | <0.0001 | 0.40         | 0.36-0.44               | 23.87  |
| CKD                                | 276       | 1.02 | 0.87-1.19               | 0.835   |              |                         | -     | 233                 | 1.00 | 0.83-1.21               | 0.981   |              |                         |        |
| Current Smoker                     | 168       | 1.61 | 1.33-1.93               | <0.0001 | 0.20         | 0.17-0.23               | 7.57  | 100                 | 1.81 | 1.42-2.28               | <0.0001 | 0.18         | 0.14-0.21               | 8.05   |
| Education                          |           |      |                         |         |              |                         |       |                     |      |                         |         |              |                         |        |
| >12 years                          | 59        | 1    |                         |         |              |                         |       | 21                  | 1    |                         |         | 0.05         | 0.02-0.06               |        |
| 6-12 years                         | 269       | 1.19 | 0.89-1.58               | 0.225   |              |                         | -     | 124                 | 1.48 | 0.93-2.36               | 0.094   | 0.22         | 0.19-0.260              | 7.13   |
| <6 years                           | 499       | 1.11 | 0.84-1.48               | 0.464   |              |                         | -     | 406                 | 1.59 | 1.01-2.51               | 0.045   | 0.73         | 0.69-0.77               | 27.08  |
| Family history of CVD              | 171       | 1.52 | 1.28-1.81               | <0.0001 | 0.21         | 0.17-0.23               | 7.18  | 99                  | 1.22 | 0.98-1.53               | 0.07    | 0.18         | 0.14-0.21               | 3.24   |
| Male gender(female as a reference) | 490       | 2.02 | 1.71-2.38               | <0.0001 |              |                         | -     | 340                 | 1.49 | 1.22-1.83               | <0.0001 |              |                         | -      |
| Prevalent CVD                      | -         |      |                         |         |              |                         | -     | 472                 | 1.62 | 1.31-2.01               | <0.0001 | 0.21         | 0.17-0.23               | 8.04   |

\*Prevalence represents the prevalence of the exposure among individuals with outcome of interest

\*\*The population attributed fractions were calculated using the following formula:  $Prevalence * ((Hazard\ ratio - 1) / Hazard\ ratio)$

HR, hazard ratio; HDL-C, high density lipoprotein cholesterol; CKD, chronic kidney disease;

The definition for categorical variables is shown in table 1.

**Table C.** Multivariate-adjusted hazard ratios and 95% confidence intervals (CIs) of potential cardiovascular risk factors for incident CVD, without obesity mediators controlling for general adiposity status using single imputation method, Tehran lipid and Glucose study (1999-2012)

|                                        | event | HR   | HR (95% CI) | p-value | Prevalence* | Prevalence (95% CI) | PAF (%)** |
|----------------------------------------|-------|------|-------------|---------|-------------|---------------------|-----------|
| BMI                                    |       |      |             |         |             |                     |           |
| Normal                                 | 222   | 1    |             |         | 0.25        | 0.22 - 0.28         |           |
| Overweight                             | 414   | 1.4  | 1.18 - 1.65 | <0.0001 | 0.46        | 0.43 - 0.5          | 13.14     |
| Obesity                                | 257   | 1.55 | 1.28 - 1.87 | <0.0001 | 0.29        | 0.26 - 0.32         | 10.29     |
| Current Smoker                         | 189   | 1.53 | 1.29 - 1.82 | <0.0001 | 0.21        | 0.18 - 0.24         | 7.27      |
| Education                              |       |      |             |         |             |                     |           |
| >12 years                              | 66    | 1    |             |         |             |                     |           |
| 6-12 years                             | 291   | 1.21 | 0.93 - 1.59 | 0.158   |             |                     |           |
| <6 years                               | 536   | 1.17 | 0.89 - 1.53 | 0.266   |             |                     |           |
| Family history of CVD                  | 182   | 1.57 | 1.33 - 1.85 | <0.0001 | 0.2         | 0.18 - 0.23         | 7.26      |
| Male gender<br>(female as a reference) | 537   | 1.78 | 1.53 - 2.07 | <0.0001 |             |                     |           |

\*Prevalence represents the prevalence of the exposure among individuals with outcome of interest

\*\*The population attributed fractions were calculated using the following formula:  $Prevalence * ((Hazard\ ratio - 1) / Hazard\ ratio)$

HR, hazard ratio; HDL-C, high density lipoprotein cholesterol; CKD, chronic kidney disease;

The definition for categorical variables is shown in table 1.

**Table D.** Multivariate-adjusted hazard ratios and 95% confidence intervals (CIs) of potential cardiovascular risk factors for incident CVD, without obesity mediators controlling for central adiposity status using single imputation method, Tehran lipid and Glucose study (1999-2012)

|                                        | event | HR   | HR (95% CI) | p-value | Prevalence* | Prevalence (95% CI) | PAF (%)** |
|----------------------------------------|-------|------|-------------|---------|-------------|---------------------|-----------|
| Central obesity                        | 462   | 1.48 | 1.29 - 1.69 | <0.0001 | 0.52        | 0.48 - 0.55         | 16.86     |
| Current Smoker                         | 189   | 1.5  | 1.26 - 1.78 | <0.0001 | 0.21        | 0.18 - 0.24         | 7         |
| Education                              | 66    | 1    |             |         |             |                     |           |
| >12 years                              | 291   | 1.21 | 0.92 - 1.58 | 0.165   |             |                     |           |
| 6-12 years                             | 536   | 1.15 | 0.87 - 1.5  | 0.324   |             |                     |           |
| <6 years                               | 182   | 1.57 | 1.33 - 1.85 | <0.0001 |             |                     |           |
| Family history of CVD                  | 537   | 1.69 | 1.45 - 1.96 | <0.0001 | 0.2         | 0.18 - 0.23         | 7.26      |
| Male gender<br>(female as a reference) | 462   | 1.48 | 1.29 - 1.69 | <0.0001 |             |                     |           |

\*Prevalence represents the prevalence of the exposure among individuals with outcome of interest

\*\*The population attributed fractions were calculated using the following formula:  $Prevalence * ((Hazard\ ratio - 1) / Hazard\ ratio)$

HR, hazard ratio; HDL-C, high density lipoprotein cholesterol; CKD, chronic kidney disease;

The definition for categorical variables is shown in table 1.

**Table E.** Multivariate-adjusted hazard ratios and 95% confidence intervals (CIs) of potential cardiovascular risk factors for incident CVD, with obesity mediators ( diabetes, hypertension, lipid profile and CKD), controlling for general adiposity status, using single imputation method, Tehran lipid and Glucose study (1999-2005)

|                                        | event | HR   | HR (95% CI) | p-value | Prevalence* | Prevalence (95% CI) | PAF (%)** |
|----------------------------------------|-------|------|-------------|---------|-------------|---------------------|-----------|
| BMI                                    |       |      |             |         |             |                     |           |
| Normal                                 | 222   | 1    |             |         |             |                     |           |
| Overweight                             | 414   | 1.15 | 0.97 - 1.36 | 0.109   |             |                     |           |
| Obesity                                | 257   | 1.09 | 0.9 - 1.33  | 0.38    |             |                     |           |
| High TG                                | 578   | 1.01 | 0.86 - 1.18 | 0.936   |             | 0.62 - 0.68         |           |
| High TC                                | 397   | 1.59 | 1.37 - 1.83 | <0.0001 | 0.44        | 0.41 - 0.48         | 16.33     |
| low HDL-C                              | 633   | 1.22 | 1.05 - 1.42 | 0.011   | 0.71        | 0.68 - 0.74         | 12.8      |
| Blood pressure status                  |       |      |             |         |             |                     |           |
| Normal                                 | 190   | 1    |             |         | 0.21        | 0.19 - 0.24         |           |
| prehypertension                        | 259   | 1.12 | 0.92 - 1.36 | 0.259   | 0.29        | 0.26 - 0.32         |           |
| Hypertension                           | 444   | 1.81 | 1.5 - 2.2   | <0.0001 | 0.5         | 0.46 - 0.53         | 22.38     |
| Blood sugar status                     |       |      |             |         |             |                     |           |
| Normal                                 | 391   | 1    |             |         | 0.44        | 0.41 - 0.47         |           |
| Pre diabetes                           | 233   | 1.11 | 0.94 - 1.31 | 0.218   | 0.26        | 0.23 - 0.29         |           |
| Diabetes                               | 269   | 1.88 | 1.59 - 2.22 | <0.0001 | 0.3         | 0.27 - 0.33         | 14.04     |
| CKD                                    | 295   | 1.03 | 0.88 - 1.2  | 0.698   |             |                     |           |
| Current Smoker                         | 189   | 1.63 | 1.37 - 1.95 | <0.0001 | 0.21        | 0.18 - 0.24         | 8.12      |
| Education                              |       |      |             |         |             |                     |           |
| >12 years                              | 66    | 1    |             |         |             |                     |           |
| 6-12 years                             | 291   | 1.17 | 0.9 - 1.53  | 0.248   |             |                     |           |
| <6 years                               | 536   | 1.13 | 0.86 - 1.48 | 0.395   |             |                     |           |
| Family history of CVD                  | 182   | 1.51 | 1.28 - 1.78 | <0.0001 | 0.2         | 0.18 - 0.23         | 6.75      |
| Male gender<br>(female as a reference) | 537   | 2.09 | 1.78 - 2.45 | <0.0001 |             |                     |           |

\*Prevalence represents the prevalence of the exposure among individuals with outcome of interest

\*\*The population attributed fractions were calculated using the following formula:  $Prevalence * ((Hazard\ ratio - 1) / Hazard\ ratio)$

HR, hazard ratio; HDL-C, high density lipoprotein cholesterol; CKD, chronic kidney disease;

The definition for categorical variables is shown in table 1.

**Table F.** Multivariate-adjusted hazard ratios and 95% confidence intervals (CIs) of potential cardiovascular risk factors for incident CVD, with obesity mediators ( diabetes, hypertension, lipid profile and CKD), controlling for general adiposity status, using single imputation method, Tehran lipid and Glucose study (1999-2005)

|                                        | event | HR   | HR (95% CI) | p-value | Prevalence* | Prevalence (95% CI) | PAF (%)** |
|----------------------------------------|-------|------|-------------|---------|-------------|---------------------|-----------|
| Central obesity                        | 462   | 1.16 | 1.01 - 1.33 | 0.041   | 0.52        | 0.48 - 0.55         | 7.17      |
| High TG                                | 578   | 1    | 0.86 - 1.17 | 0.983   |             |                     |           |
| High TC                                | 397   | 1.58 | 1.37 - 1.83 | <0.0001 | 0.44        | 0.41 - 0.48         | 16.15     |
| low HDL-C                              | 633   | 1.21 | 1.04 - 1.42 | 0.013   | 0.71        | 0.68 - 0.74         | 12.32     |
| Blood pressure status                  |       |      |             |         |             |                     |           |
| Normal                                 | 190   | 1    |             |         | 0.21        | 0.19 - 0.24         |           |
| prehypertension                        | 259   | 1.12 | 0.92 - 1.35 | 0.258   | 0.29        | 0.26 - 0.32         |           |
| Hypertension                           | 444   | 1.79 | 1.48 - 2.17 | <0.0001 | 0.5         | 0.46 - 0.53         | 22.07     |
| Blood sugar status                     |       |      |             |         |             |                     |           |
| Normal                                 | 391   | 1    |             |         | 0.44        | 0.41 - 0.47         |           |
| Pre diabetes                           | 233   | 1.1  | 0.93 - 1.3  | 0.261   | 0.26        | 0.23 - 0.29         |           |
| Diabetes                               | 269   | 1.85 | 1.57 - 2.19 | <0.0001 | 0.3         | 0.27 - 0.33         | 13.78     |
| CKD                                    | 295   | 1.03 | 0.88 - 1.2  | 0.689   |             |                     |           |
| Current Smoker                         | 189   | 1.62 | 1.36 - 1.93 | <0.0001 | 0.21        | 0.18 - 0.24         | 8.04      |
| Education                              |       |      |             |         |             |                     |           |
| >12 years                              | 66    | 1    |             |         |             |                     |           |
| 6-12 years                             | 291   | 1.17 | 0.89 - 1.53 | 0.258   |             |                     |           |
| <6 years                               | 536   | 1.11 | 0.85 - 1.46 | 0.448   |             |                     |           |
| Family history of CVD                  | 182   | 1.51 | 1.28 - 1.78 | <0.0001 | 0.2         | 0.18 - 0.23         | 6.75      |
| Male gender<br>(female as a reference) | 537   | 2.07 | 1.77 - 2.43 | <0.0001 |             |                     |           |

\*Prevalence represents the prevalence of the exposure among individuals with outcome of interest

\*\*The population attributed fractions were calculated using the following formula:  $Prevalence * ((Hazard\ ratio - 1) / Hazard\ ratio)$

HR, hazard ratio; HDL-C, high density lipoprotein cholesterol; CKD, chronic kidney disease;

The definition for categorical variables is shown in table 1.

**Table G.** Multivariate-adjusted hazard ratios and 95% confidence intervals (CIs) of potential cardiovascular risk factors for all-cause mortality, without obesity mediators controlling for general adiposity status using single imputation method, Tehran lipid and Glucose study (1999-2012)

|                                        | event | HR   | HR (95% CI) | p-value | Prevalence* | Prevalence (95% CI) | PAF (%)** |
|----------------------------------------|-------|------|-------------|---------|-------------|---------------------|-----------|
| BMI                                    |       |      |             |         |             |                     |           |
| Normal                                 | 220   | 1    |             |         | 0.36        | 0.32 - 0.4          |           |
| Overweight                             | 241   | 0.83 | 0.69 - 1    | 0.05    | 0.4         | 0.36 - 0.44         |           |
| Obesity                                | 145   | 1.02 | 0.81 - 1.28 | 0.866   | 0.24        | 0.21 - 0.27         |           |
| Current Smoker                         | 114   | 1.64 | 1.32 - 2.04 | <0.0001 | 0.19        | 0.16 - 0.22         | 7.41      |
| Education                              |       |      |             |         |             |                     |           |
| >12 years                              | 23    | 1    |             |         | 0.04        | 0.02 - 0.05         |           |
| 6-12 years                             | 135   | 1.59 | 1.02 - 2.48 | 0.04    | 0.22        | 0.19 - 0.26         | 8.16      |
| <6 years                               | 448   | 1.8  | 1.17 - 2.77 | 0.008   | 0.74        | 0.7 - 0.77          | 32.89     |
| Family history of CVD                  | 105   | 1.33 | 1.08 - 1.65 | 0.009   | 0.17        | 0.14 - 0.2          | 4.22      |
| Male gender<br>(female as a reference) | 377   | 1.48 | 1.23 - 1.78 | <0.0001 |             |                     |           |
| Prevalence CVD                         | 130   | 2.03 | 1.67 - 2.48 | <0.0001 | 0.21        | 0.18 - 0.25         | 10.66     |

\*Prevalence represents the prevalence of the exposure among individuals with outcome of interest

\*\*The population attributed fractions were calculated using the following formula:  $Prevalence * ((Hazard\ ratio - 1) / Hazard\ ratio)$

HR, hazard ratio; HDL-C, high density lipoprotein cholesterol; CKD, chronic kidney disease;

The definition for categorical variables is shown in table 1.

**Table H.** Multivariate-adjusted hazard ratios and 95% confidence intervals (CIs) of potential cardiovascular risk factors for all-cause mortality, without obesity mediators controlling for central adiposity status using single imputation method, Tehran lipid and Glucose study (1999-2012)

|                                     | event | HR   | HR (95% CI) | p-value | Prevalence* | Prevalence (95% CI) | PAF (%)** |
|-------------------------------------|-------|------|-------------|---------|-------------|---------------------|-----------|
| Central obesity                     | 279   | 1.1  | 0.94 - 1.3  | 0.242   |             |                     |           |
| Current Smoker                      | 114   | 1.67 | 1.34 - 2.07 | <0.0001 | 0.19        | 0.16 - 0.22         | 7.62      |
| Education                           |       |      |             |         |             |                     |           |
| >12 years                           | 23    | 1    |             |         | 0.04        | 0.02 - 0.05         |           |
| 6-12 years                          | 135   | 1.59 | 1.02 - 2.47 | 0.041   | 0.22        | 0.19 - 0.26         | 8.16      |
| <6 years                            | 448   | 1.77 | 1.15 - 2.73 | 0.009   | 0.74        | 0.7 - 0.77          | 32.19     |
| Family history of CVD               | 105   | 1.33 | 1.07 - 1.64 | 0.01    | 0.17        | 0.14 - 0.2          | 4.22      |
| Male gender (female as a reference) | 377   | 1.47 | 1.23 - 1.77 | <0.0001 |             |                     |           |
| Prevalence CVD                      | 130   | 2    | 1.64 - 2.44 | <0.0001 | 0.21        | 0.18 - 0.25         | 10.5      |

\*Prevalence represents the prevalence of the exposure among individuals with outcome of interest

\*\*The population attributed fractions were calculated using the following formula:  $\text{Prevalence} * ((\text{Hazard ratio} - 1) / \text{Hazard ratio})$

HR, hazard ratio; HDL-C, high density lipoprotein cholesterol; CKD, chronic kidney disease;

The definition for categorical variables is shown in table 1.



**Table I.** Multivariate-adjusted hazard ratios and 95% confidence intervals (CIs) of potential cardiovascular risk factors for all-cause mortality, with obesity mediators ( diabetes, hypertension, lipid profile and CKD), controlling for general adiposity status, using single imputation method, Tehran lipid and Glucose study (1999-2005)

|                                     | event | HR   | HR<br>(95% CI) | p-value | Prevalence<br>* | Prevalence<br>(95% CI) | PAF<br>(%)** |
|-------------------------------------|-------|------|----------------|---------|-----------------|------------------------|--------------|
| BMI                                 |       |      |                |         |                 |                        |              |
| Normal                              | 220   | 1    |                |         | 0.36            | 0.32 - 0.4             |              |
| Overweight                          | 241   | 0.73 | 0.6 - 0.89     | 0.002   | 0.4             | 0.36 - 0.44            | -14.79       |
| Obesity                             | 145   | 0.81 | 0.64 - 1.02    | 0.07    | 0.24            | 0.21 - 0.27            | -5.62        |
| High TG                             | 321   | 0.83 | 0.69 - 0.99    | 0.041   | 0.53            | 0.49 - 0.57            | -10.86       |
| High TC                             | 230   | 1.05 | 0.87 - 1.25    | 0.634   | 0.38            | 0.34 - 0.42            |              |
| low HDL-C                           | 377   | 0.99 | 0.83 - 1.18    | 0.9     | 0.62            | 0.58 - 0.66            |              |
| Blood pressure status               |       |      |                |         |                 |                        |              |
| Normal                              | 113   | 1    |                |         | 0.19            | 0.16 - 0.22            |              |
| prehypertension                     | 147   | 0.98 | 0.76 - 1.27    | 0.896   | 0.24            | 0.21 - 0.28            |              |
| Hypertension                        | 346   | 1.49 | 1.18 - 1.9     | 0.001   | 0.57            | 0.53 - 0.61            | 18.74        |
| Blood sugar status                  |       |      |                |         |                 |                        |              |
| Normal                              | 229   | 1    |                |         | 0.38            | 0.34 - 0.42            |              |
| Pre diabetes                        | 141   | 1.14 | 0.92 - 1.42    | 0.233   | 0.23            | 0.2 - 0.27             |              |
| Diabetes                            | 236   | 2.53 | 2.07 - 3.08    | <0.0001 | 0.39            | 0.35 - 0.43            | 23.58        |
| CKD                                 | 256   | 1.03 | 0.86 - 1.23    | 0.749   | 0.42            | 0.38 - 0.46            |              |
| Current Smoker                      | 114   | 1.8  | 1.44 - 2.25    | <0.0001 | 0.19            | 0.16 - 0.22            | 8.44         |
| Education                           |       |      |                |         |                 |                        |              |
| >12 years                           | 23    | 1    |                |         | 0.04            | 0.02 - 0.05            |              |
| 6-12 years                          | 135   | 1.54 | 0.99 - 2.4     | 0.056   | 0.22            | 0.19 - 0.26            |              |
| <6 years                            | 448   | 1.69 | 1.1 - 2.61     | 0.017   | 0.74            | 0.7 - 0.77             | 30.21        |
| Family history of CVD               | 105   | 1.23 | 0.99 - 1.53    | 0.057   | 0.17            | 0.14 - 0.2             |              |
| Male gender (female as a reference) | 377   | 1.53 | 1.26 - 1.86    | <0.0001 |                 |                        |              |
| Prevalent CVD                       | 130   | 1.67 | 1.36 - 2.05    | <0.0001 | 0.21            | 0.18 - 0.25            | 8.43         |

\*Prevalence represents the prevalence of the exposure among individuals with outcome of interest

\*\*The population attributed fractions were calculated using the following formula:  $Prevalence * ((Hazard\ ratio - 1) / Hazard\ ratio)$

HR, hazard ratio; HDL-C, high density lipoprotein cholesterol; CKD, chronic kidney disease;

The definition for categorical variables is shown in table 1.

**Table J.** Multivariate-adjusted hazard ratios and 95% confidence intervals (CIs) of potential cardiovascular risk factors for all-cause, with obesity mediators ( diabetes, hypertension, lipid profile and CKD), controlling for general adiposity status, using single imputation method, Tehran lipid and Glucose study (1999-2005)

|                                     | event | HR   | HR (95% CI) | p-value | Prevalence* | Prevalence (95% CI) | PAF (%)** |
|-------------------------------------|-------|------|-------------|---------|-------------|---------------------|-----------|
| Central obesity                     | 279   | 0.95 | 0.81 - 1.13 | 0.588   |             |                     |           |
| High TG                             | 321   | 0.8  | 0.67 - 0.96 | 0.017   | 0.53        | 0.49 - 0.57         | -13.25    |
| High TC                             | 230   | 1.04 | 0.87 - 1.25 | 0.667   |             |                     |           |
| low HDL-C                           | 377   | 0.98 | 0.82 - 1.17 | 0.844   |             |                     |           |
| Blood pressure status               |       |      |             |         |             |                     |           |
| Normal                              | 113   | 1    |             |         | 0.19        | 0.16 - 0.22         |           |
| prehypertension                     | 147   | 0.93 | 0.73 - 1.2  | 0.601   | 0.24        | 0.21 - 0.28         |           |
| Hypertension                        | 346   | 1.43 | 1.13 - 1.81 | 0.003   | 0.57        | 0.53 - 0.61         | 17.14     |
| Blood sugar status                  |       |      |             |         |             |                     |           |
| Normal                              | 229   | 1    |             |         | 0.38        | 0.34 - 0.42         |           |
| Pre diabetes                        | 141   | 1.11 | 0.9 - 1.38  | 0.335   | 0.23        | 0.2 - 0.27          |           |
| Diabetes                            | 236   | 2.45 | 2.01 - 2.99 | <0.0001 | 0.39        | 0.35 - 0.43         | 23.08     |
| CKD                                 | 256   | 1.01 | 0.85 - 1.21 | 0.895   |             |                     |           |
| Current Smoker                      | 114   | 1.84 | 1.48 - 2.3  | <0.0001 | 0.19        | 0.16 - 0.22         | 8.67      |
| Education                           |       |      |             |         |             |                     |           |
| >12 years                           | 23    | 1    |             |         | 0.04        | 0.02 - 0.05         |           |
| 6-12 years                          | 135   | 1.54 | 0.99 - 2.41 | 0.055   | 0.22        | 0.19 - 0.26         | 7.71      |
| <6 years                            | 448   | 1.68 | 1.09 - 2.59 | 0.019   | 0.74        | 0.7 - 0.77          | 29.95     |
| Family history of CVD               | 105   | 1.22 | 0.99 - 1.52 | 0.067   |             |                     |           |
| Male gender (female as a reference) | 377   | 1.54 | 1.27 - 1.87 | <0.0001 |             |                     |           |
| Prevalent CVD                       | 130   | 1.66 | 1.36 - 2.04 | <0.0001 | 0.21        | 0.18 - 0.25         | 8.35      |

\*Prevalence represents the prevalence of the exposure among individuals with outcome of interest

\*\*The population attributed fractions were calculated using the following formula:  $Prevalence * ((Hazard\ ratio - 1) / Hazard\ ratio)$

HR, hazard ratio; HDL-C, high density lipoprotein cholesterol; CKD, chronic kidney disease;

The definition for categorical variables is shown in table 1
